# Supplementary material
Source: publisher figshare collection journal article supplement (https://future-science-group.figshare.com/ndownloader/files/25629812)
Supplement: Supplementary file 1 [file 25629812]

## Sheet: Database_pred
Sample Name	Dominant Peak (bp)	Peak Height (FU)	Region 1 from: (bp)	Region 1 to: (bp)	Region 2 from: (bp)	Region 2 to: (bp)	Region 1 AVG fragments length (bp)	Region 2 AVG fragments length (bp)	Area 1	Area 2	Fetal Fragments Ratio	cffDNA% Clarigo	cffDNA% predicted	lwr 95% confidence	upr 95% confidence	residuals
NIPT11	175	167.6	78	143	163	168	131	165	82.6	117.8	0.701188	11	9.14303	8.77383	9.51222	1.85697
NIPT12	173	179.7	78	143	163	168	125	165	103.8	120.1	0.86428	11.7	11.0318	10.4774	11.5861	0.668248
NIPT13	173	165.4	78	143	163	168	132	165	60.6	125.5	0.482869	8.5	6.7377	6.30836	7.16705	1.7623
NIPT14	172	137.5	78	143	163	168	129	165	79.2	95.1	0.832808	12.5	10.317	9.84861	10.7854	2.18302
NIPT15	174	192	78	143	163	168	129	165	81.4	126.6	0.64297	10.4	8.72117	8.31256	9.12977	1.67883
NIPT17	173	161.3	78	143	163	168	134	165	52.5	109.7	0.478578	8	6.65479	6.22324	7.08633	1.34521
NIPT19	173	119.2	78	143	163	168	128	165	70.8	84.4	0.838863	9.7	10.2224	9.7348	10.7099	-0.522353
NIPT20	174	164.2	78	143	163	168	126	165	122.1	126.6	0.964455	9.5	11.9904	11.3243	12.6564	-2.49035
NIPT21	170	101.5	78	143	163	168	127	165	88	73	1.20548	14.3	14.0735	13.0486	15.0984	0.22647
NIPT25	172	125.4	78	143	163	168	132	165	51.3	93.5	0.548663	8.1	7.10528	6.7115	7.49907	0.994719
NIPT26	176	167	78	143	163	168	133	165	48.3	95.7	0.504702	6.2	6.99038	6.5808	7.39996	-0.79038
NIPT27_2	174	44.4	78	143	163	168	130	165	15.7	28.2	0.556738	4.9	6.48177	5.80107	7.16247	-1.58177
NIPT28	170	134.8	78	143	163	168	132	165	61.6	112.7	0.546584	7.3	7.16516	6.7853	7.54502	0.134844
NIPT29	174	272.1	78	143	163	168	128	165	105.5	185.8	0.567815	7.5	8.60365	7.86405	9.34325	-1.10365
NIPT30	176	169.9	78	143	163	168	132	165	53	110.3	0.480508	6.8	6.75144	6.31594	7.18695	0.0485557
NIPT31	172	267	78	143	163	168	132	165	121.7	189.7	0.641539	12.3	9.36456	8.6436	10.0855	2.93544
NIPT32	175	156.4	78	143	163	168	130	165	61.2	104	0.588462	7.9	7.81263	7.46726	8.15801	0.0873678
NIPT33	175	184.9	78	143	163	168	130	165	91.7	123.1	0.744923	8.8	9.77301	9.33374	10.2123	-0.973009
NIPT34	174	139	78	143	163	168	126	165	71	89.3	0.795073	9.1	9.91776	9.49199	10.3435	-0.817765
NIPT35	172	167.7	78	143	163	168	132	165	91.6	122.3	0.748978	11.4	9.66619	9.26239	10.07	1.73381
NIPT36	172	85.8	78	143	163	168	123	165	104.6	69	1.51594	16.5	17.3286	15.7967	18.8604	-0.828578
NIPT37	175	151.5	78	143	163	168	125	165	133	109	1.22018	16.8	14.6736	13.6197	15.7274	2.12642
NIPT39	176	171.9	78	143	163	168	130	165	86.8	122.9	0.706265	8.1	9.23629	8.85602	9.61657	-1.13629
NIPT41	171	12.3	78	143	163	168	135	165	3.4	9.1	0.373626	5.8	4.19851	3.22714	5.16988	1.60149
NIPT42	172	115.8	78	143	163	168	130	165	73.1	84.2	0.868171	10	10.5128	9.9869	11.0387	-0.512786
NIPT43	174	216.2	78	143	163	168	130	165	105.7	154.2	0.685473	8.9	9.39833	8.88921	9.90744	-0.498329
NIPT44	174	205.5	78	143	163	168	133	165	98.3	150.4	0.65359	8.9	8.95586	8.499	9.41272	-0.0558623
NIPT45	176	205	78	143	163	168	134	165	69.4	130	0.533846	6.8	7.6428	7.17217	8.11343	-0.842799
NIPT46_2	172	213.1	78	143	163	168	131	165	102.1	163	0.62638	9.5	8.72527	8.24447	9.20606	0.774731
NIPT52	177	108.7	78	143	163	168	130	165	41.5	67.4	0.615727	8.8	7.69147	7.29188	8.09106	1.10853
NIPT55	177	126.5	78	143	163	168	134	165	36.3	74.4	0.487903	7.5	6.45091	6.00372	6.8981	1.04909
NIPT56	181	63.5	78	143	163	168	132	165	30.9	35.6	0.867978	10.8	10.0511	9.4014	10.7008	0.748893
NIPT66	175	189.8	78	143	163	168	130	165	66.8	119.6	0.558528	7.9	7.77899	7.36488	8.19309	0.121015
NIPT67	176	176.8	78	143	163	168	132	165	63.8	106	0.601887	7.8	8.13861	7.76992	8.50731	-0.338611
NIPT69	178	159.8	78	143	163	168	128	165	75.6	100.7	0.750745	10.2	9.61608	9.22252	10.0096	0.583919
NIPT71_2	173	111.9	78	143	163	168	133	165	44.7	73.6	0.607337	10.6	7.62789	7.23467	8.02112	2.97211
NIPT72	175	118.8	78	143	163	168	132	165	67.2	80	0.84	10.2	10.2313	9.74195	10.7206	-0.0312695
NIPT73	173	109.5	78	143	163	168	129	165	69.2	82.7	0.836759	8.8	10.1141	9.61475	10.6135	-1.31413
NIPT75	171	104.5	78	143	163	168	128	165	67.4	80.5	0.837267	10.7	10.0757	9.56658	10.5849	0.624253
NIPT76	176	89.5	78	143	163	168	133	165	37.5	56.7	0.661376	8.6	8.02165	7.5654	8.4779	0.578354
NIPT79	178	124.3	78	143	163	168	130	165	51.9	74.8	0.69385	6.9	8.68235	8.31804	9.04665	-1.78235
NIPT8_2	174	195.8	78	143	163	168	130	165	87.7	123.7	0.708973	11.4	9.4759	9.02925	9.92255	1.9241
NIPT80	173	239.2	78	143	163	168	130	165	93.8	166	0.56506	8	8.28445	7.6935	8.87541	-0.284452
NIPT81	174	159.1	78	143	163	168	131	165	112.1	115.1	0.973936	8.4	12.0492	11.3753	12.723	-3.64915
NIPT82	173	199.1	78	143	163	168	128	165	116.5	153.2	0.760444	7.8	10.0674	9.5722	10.5626	-2.26741
NIPT83_2	173	149.7	78	143	163	168	127	165	100.9	104.3	0.967402	14.3	11.8951	11.2396	12.5507	2.40485
NIPT85	176	190.8	78	143	163	168	124	165	91.4	118.1	0.77392	7.6	10.1418	9.66027	10.6233	-2.54176
NIPT86	174	175.1	78	143	163	168	133	165	81.4	108	0.753704	8.1	9.78286	9.36031	10.2054	-1.68286
NIPT87	173	285.7	78	143	163	168	131	165	112.6	190.1	0.59232	9.9	8.99097	8.18635	9.79558	0.909033
NIPT88	176	235.9	78	143	163	168	134	165	76	138	0.550725	8	8.09878	7.51876	8.6788	-0.0987823
NIPT92	169	313.5	78	143	163	168	129	165	190	258	0.736434	10.7	10.8103	9.82533	11.7952	-0.110253
NIPT93	170	61.4	78	143	163	168	130	165	23	44.4	0.518018	9.7	6.20799	5.57706	6.83893	3.49201
NIPT94	174	221.2	78	143	163	168	134	165	65.4	150.7	0.433975	6.1	6.69367	6.10175	7.28559	-0.593669
NIPT95	173	56.9	78	143	163	168	131	165	21.9	39.1	0.560102	8.3	6.62838	6.00552	7.25125	1.67162
NIPT96	172	163.1	78	143	163	168	131	165	63.8	117.5	0.542979	7.2	7.37443	6.9992	7.74966	-0.17443
NIPT98	174	47.8	78	143	163	168	131	165	26.2	32.5	0.806154	11.2	9.23749	8.57373	9.90125	1.96251
NIPT99	168	67.4	78	143	163	168	127	165	45.3	59.5	0.761345	11.6	8.92	8.3564	9.4836	2.68
UD1.1_2	176	62.1	78	143	163	168	132	165	17.6	35.6	0.494382	7.9	5.95583	5.30924	6.60242	1.94417
UD11.1	177	94.8	78	143	163	168	131	165	31	48.2	0.643154	7.4	7.86907	7.43042	8.30772	-0.469071
UD12.1_3	172	104.6	78	143	163	168	132	165	32.4	80	0.405	4.1	5.35243	4.75833	5.94654	-1.25243
UD15.1_2	174	70	78	143	163	168	137	165	13.9	43.3	0.321016	2	4.13055	3.32516	4.93595	-2.13055
UD16.1	171	68.8	78	143	163	168	133	165	27	48.8	0.553279	5.2	6.65838	6.08249	7.23426	-1.45838
UD17	178	122.3	78	143	163	168	134	165	43.8	69.5	0.630216	9.7	7.96932	7.60751	8.33113	1.73068
UD18	173	175.1	78	143	163	168	133	165	62.9	116.9	0.538067	7.9	7.42619	7.03264	7.81975	0.473808
UD19_2	170	173.8	78	143	163	168	132	165	68.9	145.5	0.47354	4.8	6.70956	6.26279	7.15633	-1.90956
UD2.1	180	121.3	78	143	163	168	129	165	34.1	54.5	0.625688	7.9	7.91105	7.54628	8.27582	-0.0110501
UD21	174	185.6	78	143	163	168	134	165	40.7	113	0.360177	6	5.57432	4.97977	6.16887	0.425677
UD21.1_2	174	111.6	78	143	163	168	133	165	31.3	68.4	0.457602	3.1	5.98883	5.47571	6.50195	-2.88883
UD24	175	28.3	78	143	163	168	134	165	8.1	16.9	0.47929	3.6	5.49389	4.68783	6.29994	-1.89389
UD25	176	122.8	78	143	163	168	135	165	31.3	74.4	0.420699	6.6	5.68393	5.1511	6.21676	0.916069
UD26	172	223.8	78	143	163	168	132	165	83.4	155	0.538065	10.7	7.8541	7.31871	8.38949	2.8459
UD27_2	170	223.6	78	143	163	168	134	165	56.4	165.7	0.340374	3.9	5.69181	4.99895	6.38466	-1.79181
UD28	173	157.3	78	143	163	168	132	165	54.2	105.6	0.513258	5.4	6.99865	6.60255	7.39474	-1.59865
UD29	169	233.4	78	143	163	168	133	165	98.5	181.3	0.543298	6	7.99565	7.42391	8.5674	-1.99565
UD3.1_2	176	167.2	78	143	163	168	134	165	41.4	92.1	0.449511	4.9	6.38896	5.92226	6.85567	-1.48896
UD30	173	170.8	78	143	163	168	134	165	53.4	119.5	0.446862	10.2	6.39164	5.91917	6.86411	3.80836
UD31	174	167.5	78	143	163	168	131	165	65.7	119.2	0.551174	7.9	7.50266	7.12843	7.87689	0.397337
UD33	172	168.2	78	143	163	168	132	165	76.3	120.3	0.634248	11	8.41671	8.06697	8.76645	2.58329
UD34	169	205.2	78	143	163	168	133	165	85.5	169.9	0.503237	5.1	7.31004	6.82083	7.79924	-2.21004
UD35	170	223.1	78	143	163	168	133	165	89	167.9	0.530077	8	7.76066	7.22477	8.29654	0.239343
UD37_2	173	94.7	78	143	163	168	135	165	23.4	66.1	0.354009	4	4.70817	4.02148	5.39486	-0.70817
UD4.1	176	51.2	78	143	163	168	128	165	21.4	30	0.713333	8.5	8.25294	7.63664	8.86924	0.24706
UD40	167	275	78	143	163	168	133	165	88.7	238.9	0.371285	7.5	6.48128	5.64492	7.31765	1.01872
UD41	176	136.4	78	143	163	168	133	165	37.7	84.4	0.446682	5	6.08741	5.60831	6.5665	-1.08741
UD42	171	168.2	78	143	163	168	131	165	75.4	126.9	0.594169	5.1	7.97869	7.62357	8.33381	-2.87869
UD43	169	180.4	78	143	163	168	134	165	75.1	134.7	0.557535	8.1	7.68553	7.29344	8.07763	0.414467
UD44	174	131	78	143	163	168	133	165	46.1	91.1	0.506037	5.9	6.68864	6.26765	7.10963	-0.788637
UD45	171	188.1	78	143	163	168	133	165	90.4	143.1	0.631726	7.8	8.56401	8.16851	8.95952	-0.764015
UD46	173	101.6	78	143	163	168	132	165	50.1	68.1	0.735683	8.6	8.94006	8.50501	9.37512	-0.340063
UD5.1	180	103.1	78	143	163	168	131	165	26.9	52.5	0.512381	5.9	6.51281	6.03193	6.99368	-0.612807
UD6.1	176	36.1	78	143	163	168	125	165	15.4	19.2	0.802083	7.4	9.09019	8.37991	9.80048	-1.69019
UD7.1	180	37.9	78	143	163	168	126	165	15.8	18.5	0.854054	7.3	9.67399	8.9413	10.4067	-2.37399
UD9.1	179	50.3	78	143	163	168	129	165	15	24.4	0.614754	6.5	7.16767	6.5392	7.79615	-0.667672
